# Supplementary material for: ZnO modified ZSM-5 and Y zeolites fabricated by atomic layer deposition for propane conversion
Source: Royal Society of Chemistry journal article supplement (doi:10.1039/c5cp05043j), 2015-11-20
Supplement: c5cp05043j1.pdf [file c5cp05043j1.pdf]

Electronic Supplementary Information  
For

## **ZnO Modified ZSM-5 and Y Zeolites Fabricated by Atomic Layer**

### **Deposition for Propane Conversion**

Ting Gong, Lijun Qin, Jian Lu, and Hao Feng\*

#### **Additional Figures**

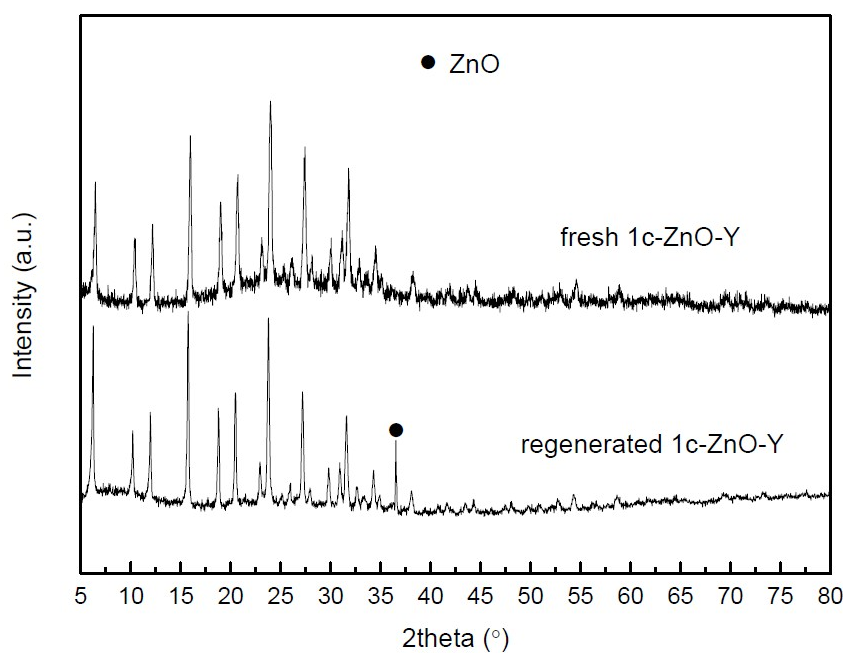

**Figure S1. XRD patterns of fresh and regenerated 1c-ZnO-Y catalysts**

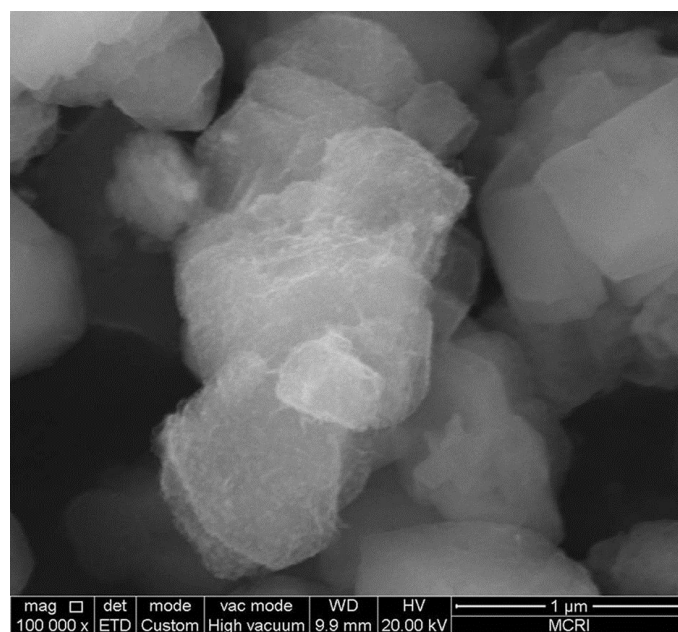

**Figure S2. SEM image of regenerated 1c-ZnO-Y catalyst**
